# Pre-endoscopic screening of precancerous lesions in gastric cancer using deep learning

1 Lan Wang<sup>1#</sup>, Qian Zhang<sup>1#</sup>, Peng Zhang<sup>1</sup>, Bowen Wu<sup>1</sup>, Shiyu Du<sup>2</sup>, Kaiqiang Tang<sup>3</sup>, ShaoLi<sup>1\*</sup>

2 <sup>1</sup> Institute for TCM-X, MOE Key Laboratory of Bioinformatics, Bioinformatics Division, BNRIST,  
3 Department of Automation, Tsinghua University, Beijing, China

4 <sup>2</sup> Department of Gastroenterology, China-Japan Friendship Hospital, Chaoyang District, Beijing,  
5 China

6 <sup>3</sup>Department of Control and Systems Engineering, Nanjing University, Nanjing, China

7 # These authors contributed equally to this work.

## 8 \* Correspondence:

9 Shao Li, MD

10 Institute for TCM-X, MOE Key Laboratory of Bioinformatics, Bioinformatics Division, BNRIST,  
11 Department of Automation, Tsinghua University, Beijing, China

12 Email: [shaoli@mail.tsinghua.edu.cn](mailto:shaoli@mail.tsinghua.edu.cn)

## 13 Financial Support:

14 National Natural Science Foundation of China (62061160369).

15 National Natural Science Foundation of China (Grant Nos. T2341008).

16 **Keywords:** deep learning, tongue images, inquiry information, precancerous lesions of gastric  
17 cancer, pre-endoscopic screening.

## 18 Abstract

19 **Objective:** Given the high cost of endoscopy in gastric cancer (GC) screening, there is an urgent  
20 need to explore cost-effective methods for the large-scale prediction of precancerous lesions of  
21 gastric cancer (PLGC). We aim to construct a hierarchical artificial intelligence-based multimodal  
22 non-invasive method for pre-endoscopic risk screening, to provide tailored recommendations for  
23 endoscopy.

24 **Design:** From December 2022 to December 2023, a large-scale screening study was conducted in  
25 Fujian, China. Based on traditional Chinese medicine theory, we simultaneously collected tongue  
26 images and inquiry information from 1034 participants, considering the potential of these data for  
27 PLGC screening. Then, we introduced inquiry information for the first time, forming a multimodality  
28 artificial intelligence model to integrate tongue images and inquiry information for pre-endoscopic  
29 screening. Moreover, we validated this approach in another independent external validation cohort,  
30 comprising 143 participants from the China-Japan Friendship Hospital.

31 **Results:** A multimodality artificial intelligence-assisted pre-endoscopic screening model based on  
32 tongue images and inquiry information (AITonguequiry) was constructed, adopting a hierarchical  
33 prediction strategy, achieving tailored endoscopic recommendations. Validation analysis revealed  
34 that the area under the curve (AUC) values of AITonguequiry were 0.74 for PLGC (95% confidence  
35 interval (CI) 0.71 to 0.76,  $p < 0.05$ ) and 0.82 for high-risk PLGC (95% CI 0.82 to 0.83,  $p < 0.05$ ),

36 which were significantly and robustly better than those of the independent use of either tongue  
37 images or inquiry information alone, and also demonstrated superior performance compared to  
38 existing screening methodologies. In the independent external verification, the AUC values were  
39 0.69 for PLGC and 0.76 for high-risk PLGC.

40 **Conclusion:** Our AITonguequiry artificial intelligence model, for the first time, incorporates inquiry  
41 information and tongue images, leading to a higher precision and finer-grained pre-endoscopic  
42 screening of PLGC. This enhances patient screening efficiency and alleviates patient burden.

## 43 1 Introduction

44 According to recent surveys, gastric cancer is the fourth leading cause of cancer-related deaths  
45 worldwide and the second in China [1]. There are approximately 480,000 new cases and 370,000  
46 deaths of gastric cancer in China each year, accounting for half of the cases in the world [2]. Gastric  
47 cancer is thought to develop from precancerous lesions of gastric cancer (PLGC) (e.g., chronic  
48 atrophic gastritis, intestinal metaplasia, or gastric epithelial dysplasia), and the graded screening and  
49 diagnosis of natural populations for PLGC is essential to reduce gastric cancer mortality [3-5].  
50 However, the screening and diagnosis of gastric diseases still rely on gastroscopy, but its application  
51 is greatly limited because of its invasiveness, high cost, and the need for professional endoscopists  
52 [6]. Meanwhile, endoscopic screening is not suitable for large-scale natural populations, especially in  
53 rural China. Alternatively, the application of serum markers that are commonly used as screening  
54 factors in various gastric cancer risk assessment methods, such as pepsinogen I/II and gastrin-17, has  
55 been limited for risk screening in natural populations due to its invasiveness, and the high sensitivity  
56 and specificity thresholds [7, 8]. Therefore, there is an urgent need for affordable and non-invasive  
57 screening methods suitable for large-scale natural populations to improve diagnostic efficiency and  
58 reduce the incidence of gastric cancer.

59 Early studies have indicated that non-invasive features, including imaging characteristics and clinical  
60 phenotypic information, have the potential to predict the occurrence and progression of PLGC. The  
61 theory of Traditional Chinese medicine (TCM) suggests that the tongue's shape, color, size, and  
62 coating characteristics detected using tongue images reflect health status and disease  
63 severity/progression, and recent studies have shown the potential for tongue surface and color  
64 characteristics to assist in the diagnosis of PLGC [9, 10]. For digestive diseases, tongue images  
65 characteristics have been found to correlate with gastroscopic observations and predict gastric  
66 mucosal health [11, 12]. Additionally, interrogating inquiry information (e.g., living habits, dietary  
67 preferences, and physical symptoms) is crucial in understanding the disease and medical history [13].  
68 In this regard, recent studies have built risk prediction models for PLGC before endoscopy using  
69 demographics and clinical risk factors, including *H. pylori* infection, sex, age, race/ethnicity, and  
70 smoking status [14]. However, the integration of tongue images and inquiry information for high-  
71 precision endoscopic screening of PLGC to facilitate precise endoscopic recommendations has not  
72 been studied.

73 With the rapid development of artificial intelligence (AI) technology, machine learning algorithms  
74 based on deep neural networks can accurately analyze diagnostic clinical images, identify therapeutic  
75 targets, and process large datasets, which can play a role in screening and diagnosis of a variety of  
76 diseases [15-18]. Pan et al. reviewed studies related to AI methods for lung cancer risk prediction,  
77 diagnosis, prognosis, and treatment response monitoring [19]. Wang et al. construct an AI-based  
78 model of two-dimensional shear wave elastography of the liver and spleen to precisely assess the risk  
79 of GEV and high-risk gastroesophageal varices [20]. Ma et al. constructed the deep learning model

80 for screening precancerous lesions of gastric cancer based on tongue images [21]. Li et al. found that  
81 both tongue images and the tongue-coating microbiome can be used as tools for the diagnosis of  
82 gastric cancer [22]. However, the value of these features in pre-endoscopic PLGC risk screening  
83 remains uncertain, and integrating these features based on AI to achieve a more refined PLGC risk  
84 screening still poses significant challenges.

85 In this study, we integrated tongue image data and inquiry data to construct an AI-based multimodal  
86 model to assist in pre-endoscopic screening of PLGC. We evaluated the performance of predicting  
87 PLGC and high-risk PLGC in a cohort of patients diagnosed with chronic gastritis in Fujian, China,  
88 and assessed the superiority of multimodal fusion over single modality. Additionally, we validated  
89 the model's performance in another independent cohort.

## 90 **2 Materials and methods**

### 91 **2.1 Design and overview**

92 This research recruited a cohort of patients diagnosed with chronic gastritis from Fujian, China, and  
93 the recruitment period spanned from December 2022 to December 2023. Those who volunteered to  
94 participate were included in this study. This study was approved by the ethics committee of the  
95 Fujian Medical University (Approval number 58 in 2020).

### 96 **2.2 Patient enrollment**

97 One thousand and thirty-four potentially eligible patients were enrolled in this study. The inclusion  
98 criteria were as follows: 1) age between 18 and 70 years; 2) have the gastroscopy examination results  
99 saved within the past three months, or will undergo gastroscopy examination in the coming three  
100 months; 3) no previous diagnosis of cancer; 4) resides locally and is willing to cooperate with  
101 doctor's follow-up; and 5) written informed consent. Patients were excluded for the following  
102 reasons: 1) cancer patients; 2) contraindications for endoscopic examination; 3) pregnant or women  
103 planning pregnancy, as well as lactating women; 4) cardiovascular, pulmonary, renal, endocrine,  
104 neurological, and hematological disorders; 5) mental disorder; and 6). unwilling to participate or poor  
105 compliance.

### 106 **2.3 Tongue images and inquiry information**

107 It is recommended that patients adhere to a standardized procedure to acquire high-quality tongue  
108 images. Patients are advised to present themselves in natural light conditions during the morning,  
109 ensuring an empty stomach. Patients should protrude their tongue from the oral cavity, with  
110 particular attention to positioning the tip slightly downward and flattening the surface to ensure the  
111 entire tongue body is adequately visualized.

112 Simultaneously, the healthcare practitioner will engage in a comprehensive traditional Chinese  
113 medicine consultation with patients. This consultation encompasses an exploration of demographic  
114 details, such as gender, along with an assessment of pertinent lifestyle factors, including a history of  
115 smoking and alcohol consumption. Additionally, an inquiry into the patient's family medical history,  
116 dietary habits, and an evaluation of physical symptoms will be conducted. The physical symptoms  
117 evaluation involves an assessment of potential discomfort in the stomach and mouth, the patient's  
118 mental state, and their bowel and urinary habits.

### 119 **2.4 Endoscopic evaluation**

120 Two independent gastroenterology experts, each of whom had carried out more than 1000  
121 endoscopies, performed esophagogastroduodenoscopy (EGD) on all patients. The biopsy results were  
122 reported as normal, superficial gastritis, chronic atrophic gastritis, intestinal metaplasia, or  
123 intraepithelial neoplasia, and a diagnosis was assigned to each participant based on the most severe  
124 histological finding in the biopsy. The *Helicobacter pylori* (Hp) infection status was determined by  
125 enzyme-linked immunosorbent assay of plasma IgG [23]. The procedure was conducted up to 3  
126 months before or after the acquisition of images and traditional Chinese medicine inquiry, and the  
127 operators were unaware of the results of the tongue examination and inquiry information.

## 128 **2.5 Single-modality deep Learning Risk Prediction Models**

### 129 **2.5.1 Tongue images deep learning risk prediction (Single-Tongue) model**

130 This section proposes Single-Tongue, a new diagnostic approach based on single-modality deep  
131 learning using tongue images to predict PLGC and high-risk PLGC. We applied the Segment  
132 Anything Models to segment tongue images to extract the features of the effective area and avoid the  
133 influence of irrelevant edge noise information.

134 All patients were randomly divided into training and validation cohorts. The training cohort was  
135 utilized to train a deep neural network designed for this study. The performance of the trained model  
136 was evaluated through its application to the validation cohort. In order to extract the features from the  
137 tongue images, we employed a pre-trained ResNet framework that had been previously trained on the  
138 ImageNet dataset [24]. Distinct from convolutional neural networks (CNNs), ResNet tackles the  
139 issues of vanishing gradients and network degradation by introducing direct skip connections within  
140 the network, which retain a certain proportion of the output from the previous network layer. Data  
141 augmentation techniques such as random cropping, flipping, and rotation were applied to all image  
142 data to mitigate overfitting. The images were passed through ResNet during training, specifically  
143 through the bottleneck and residual units. After passing through 12 bottleneck layers, an adaptive  
144 average pooling operator was used to obtain image features, which were then flattened to a size of  
145  $2048 \times 1$ . The final classification results were generated through a softmax layer. In the single-  
146 modality experiment, two binary classification networks were trained to determine the presence or  
147 absence of PLGC or high-risk PLGC.

### 148 **2.5.2 Inquiry information deep learning risk prediction (Single-Inquiry) model**

149 The inquiry information encompasses variables such as sex, age, and the individuals' history of  
150 smoking and alcohol consumption. Furthermore, it incorporates the family medical history, dietary  
151 habits, and physical symptoms of the patients, including discomfort in the stomach and mouth and  
152 their mental state. We employed a segregation approach by categorizing the features into numerical  
153 and factor types to enhance the effectiveness of utilizing the inquiry information. The numerical  
154 features were subjected to min-max normalization, scaling them between 0 and 1. On the other hand,  
155 the factor features were transformed into numeric vectors using keyword-based encoding techniques.

156 After feature filtering and mapping, the inquiry information was input into a multilayer perceptron to  
157 obtain corresponding feature vectors. Then, two binary classification networks were trained to  
158 determine the presence or absence of PLGC or high-risk PLGC.

## 159 **2.6 Multimodality deep learning risk prediction (AITonguequiry) model**

160 Medical data are frequently multimodal. For instance, both tongue images and inquiry information  
161 encompass details associated with PLGC. Consequently, in this section, we integrated these two  
162 modalities with an attentional mechanism.

163 In the multimodality experiment, similar to the single-modality experiment, we trained two binary  
164 classification networks to determine the presence or absence of PLGC or high-risk PLGC. We  
165 employed the dropout method to eliminate a certain proportion of model parameters. Subsequently,  
166 we utilized the feature embedding method to align the feature vectors of tongue images and inquiry  
167 information for comprehensive patient information utilization.

## 168 **2.7 Statistical analysis**

169 The prediction results were validated by quantitative indexes, including sensitivity, specificity,  
170 positive predictive value and negative predictive value. The chi-squared test and t test were used to  
171 determine whether there was any significant difference in patient characteristics. The area under the  
172 receiver operating characteristic (ROC) curve (AUC) was used to estimate the probability that the  
173 model would produce a correct prediction. The DeLong test was used to test whether there was a  
174 significant difference in risk prediction between AITonguequiry and other methods.

## 175 **3 Results**

### 176 **3.1 Patient characteristics**

177 In this research, a cohort of 1034 participants was recruited in Fujian, China, and the recruitment  
178 period spanned from December 2022 to December 2023. Among these patients, NPLGC was  
179 documented in 855 (82.61%) patients, and PLGC was documented in 180 (17.39%) patients. Among  
180 PLGC, low-risk PLGC and high-risk PLGC account for 346(65.90%) and 179(34.10%), respectively.  
181 After randomization of these patients, 828 patients were assigned to the training cohort. The other  
182 207 patients composed the validation cohort.

183 The baseline characteristics of the study population are summarized in Table 1 and Table 2. Overall,  
184 the average age of patients with PLGC was 62, and the standard deviation was 7. In terms of gender,  
185 the proportion of males with PLGC (180[34.29%]), and females with PLGC (345[65.71%]). Between  
186 the training and validation cohorts, there were no significant differences in any of the baseline  
187 characteristics ( $p>0.05$ ) or in the distribution of patients between NPLGC and PLGC.

### 188 **3.2 Construction of the AITonguequiry model**

189 We build a deep learning risk prediction model based on tongue images and inquiry information  
190 (AITonguequiry) from 1034 patients to evaluate their potential in the grading screening and  
191 diagnosis of PLGC. The AITonguequiry flow chart is shown in Figure 1. As shown in Figure 1a, the  
192 study cohort and the diagnostic model were designed to assess the risk of PLGC and high-risk PLGC  
193 based on tongue images and inquiry information. The detailed multimodality model is shown in  
194 Figure 1b. The patients were categorized into two groups: Non-PLGC (NPLGC) and PLGC, and the  
195 PLGC group was further divided into low-risk PLGC (chronic atrophic gastritis) and high-risk PLGC  
196 (intestinal metaplasia or gastric epithelial dysplasia) stages. We advocate for patients predicted with  
197 PLGC to undergo endoscopic examination, with a concurrently recommending prompt endoscopic  
198 examination for those predicted with high-risk PLGC.

### 199 **3.3 Comparison of the AITonguequiry model, single modality models and baseline** 200 **characteristics**

201 We chose Single-Tongue, Single-Inquiry and baseline characteristics to identify the presence or  
202 absence of PLGC and high-risk PLGC.

203 The selection of baseline characteristics is based on individuals aged  $\geq 45$  who meet any of the  
204 following criteria, which are indicative of a high-risk profile for gastric cancer: 1) Long-term  
205 residence in high-incidence areas of gastric cancer; 2) Hp infection; 3) History of chronic atrophic  
206 gastritis, gastric ulcer, gastric polyp, residual stomach after surgery, hypertrophic gastritis, pernicious  
207 anemia, or other precancerous diseases of the stomach; 4) First-degree relatives with a history of  
208 gastric cancer; 5) Presence of other high-risk factors for gastric cancer such as high salt intake,  
209 pickled diet, smoking, and heavy alcohol consumption [25-28]. Since our screening is conducted in  
210 high-risk areas, we ignore the first criterion.

211 In identifying the presence or absence of PLGC, AITonguequiry demonstrated statistically higher  
212 AUCs than Single-Tongue, Single-Inquiry and baseline characteristics ( $p < 0.05$ ) (Figure 2a, Table  
213 3). Impressively, AITonguequiry had an AUC of 0.736 for the diagnosis of PLGC, which was higher  
214 than other methods (Figure 2a, all  $p < 0.05$ ). The sensitivity and specificity analyses also  
215 demonstrated that AITonguequiry universally outperformed the Single-Tongue, Single-Inquiry and  
216 baseline characteristics for assessing PLGC and high-risk PLGC (Table 3).

217 In identifying the presence or absence of high-risk PLGC, AITonguequiry demonstrated statistically  
218 higher AUCs than Single-Tongue, Single-Inquiry and baseline characteristics ( $p < 0.05$ ) (Figure 2b,  
219 Table 3). Impressively, AITonguequiry had an AUC of 0.816 for the diagnosis of high-risk PLGC,  
220 which was higher than other methods (Figure 2b, all  $p < 0.05$ ). The sensitivity and specificity analyses  
221 also demonstrated that AITonguequiry universally outperformed the Single-Tongue, Single-Inquiry  
222 and baseline characteristics for assessing PLGC and high-risk PLGC (Table 3).

### 223 **3.4 Evaluation of the diagnostic robustness of the AITonguequiry model**

224 All patients were randomly divided into training and validation cohorts. Simultaneously, all the  
225 images of each patient were allocated to the cohort corresponding to that patient, ensuring that there  
226 was no simultaneous presence of different images from the same patient in both cohorts. In either the  
227 validation cohort, the results in the three ROC curves always overlapped each other (Figure 3), and  
228 no significant differences were found (all  $p > 0.05$ , Table 4). These results revealed that  
229 AITonguequiry demonstrated robust and consistent performances regardless of the data from which  
230 medical centers, as long as the number of enrolled patients in different training cohorts was fairly  
231 constant.

### 232 **3.5 Independent external validation of the AITonguequiry model**

233 Moreover, 143 participants were recruited for independent external validation from the China-Japan  
234 Friendship Hospital. In the independent validation cohort, the AUC of PLGC was 0.69, and the AUC  
235 of high-risk PLGC was 0.77 (Figure 4, Table 5). These results demonstrate the effectiveness of the  
236 AITonguequiry model in independent external validation.

237

238

## 239 4 Discussion

240 Given the significant burden of GC in China and globally, it becomes imperative to adopt cost-  
241 effective approaches for large-scale screening of PLGC risk prediction in the natural population.  
242 While gastroscopy and pathological tests serve as the gold standard for diagnosing gastric diseases,  
243 they are not suitable for widespread application in the natural population. To address this pressing  
244 issue, there is an urgent need to develop noninvasive and effective screening and diagnostic methods  
245 to provide tailored recommendations for endoscopy. Deep neural network technology offers a  
246 promising avenue for advancing healthcare systems by providing heightened accuracy and  
247 computational power, thereby playing an increasingly vital role in disease risk prediction. In our  
248 study, a multimodality AI-assisted pre-endoscopic screening model based on tongue images and  
249 inquiry information (AITonguequiry) was constructed for the first time, adopting a hierarchical  
250 prediction strategy, achieving tailored endoscopic recommendations.

251 In this study, the diagnostic accuracy of AITonguequiry was significantly better than that of Single-  
252 Tongue or Single-Inquiry in assessing PLGC and high-risk PLGC. In the evaluation of PLGC, the  
253 AUC in the validation cohort was 0.74 (Figure 2a, Table 3). Thus, AITonguequiry was effective for  
254 the assessment of PLGC. In the evaluation of high-risk PLGC, the AUC in the verification cohort  
255 was 0.82, showing that AITonguequiry was effective for the assessment of high-risk PLGC (Figure  
256 2b, Table 3). The above analysis revealed that the multimodality models were effective in  
257 discriminating patients with PLGC from participants without PLGC, and could also effectively  
258 differentiate patients with high-risk PLGC from those with low-risk PLGC. Thus, the fusion model of  
259 tongue images and inquiry information further improved the diagnostic value (Figure 2, Table 3).

260 The risk prediction of PLGC using tongue images and inquiry information can serve as an effective,  
261 noninvasive auxiliary diagnostic method that can support primary healthcare systems worldwide.  
262 With the recent advancements in deep neural networks, significant progress has been made in  
263 standardizing tongue images and inquiry information risk prediction, especially in TCM. Many  
264 results have been achieved in tongue image preprocessing, tongue detection, segmentation, feature  
265 extraction and tongue analysis [28]. Xu et al. developed a multi-task joint learning model to segment  
266 and classify tongue images using deep neural networks, which can optimally extract tongue image  
267 features [29]. Li et al. pioneered the use of both tongue images and the tongue-coating microbiome as  
268 diagnostic tools for gastric cancer [22]. Similarly, Ma et al. constructed the first deep learning model  
269 for screening precancerous lesions of gastric cancer based on tongue images [21]. To our knowledge,  
270 AITonguequiry is the first simplified, novel, AI-based image processing tool that can accurately and  
271 noninvasively identify PLGC and high-risk PLGC. Moreover, our AITonguequiry multimodal  
272 model, for the first time, incorporates inquiry information and employs a hierarchical prediction  
273 strategy, resulting in more refined endoscopic recommendations. We advocate for patients predicted  
274 with PLGC to undergo endoscopic examination, with a concurrently recommending prompt  
275 endoscopic examination for those predicted with high-risk PLGC. With the AITonguequiry, the  
276 operator only needs to carry out the daily data acquisition workflow to analyze the critical  
277 information automatically, making this model very convenient for clinical applications, which  
278 enhances patient screening efficiency and alleviates patient burden.

279 According to the principles of TCM, tongue manifestation serves as a crucial indication of  
280 "collaterals" [30]. It plays a significant role in various disorders such as gastric diseases [21],  
281 rheumatic conditions [31], hepatic disorders [32], and tumors [10], among others. Tongue color,  
282 thickness, moisture, and other changes, as well as the rich network of vessels in the tongue area [30],  
283 to a certain extent, can reflect the pathological changes in the spleen, stomach, internal organs, joints,

284 and many other parts. Tongue diagnosis and inquiry are integral components of the four diagnostic  
285 methods in TCM. The characteristics of the tongue's shape, color, size, and coating, as detected  
286 through tongue images, can reflect an individual's health status and the severity/progression of  
287 diseases [33]. In addition, inquiry information, including demographics, behavior, and physical  
288 symptoms, plays a crucial role in understanding the disease and medical history. In this study, we  
289 discovered that useful features for predicting PLGC can be extracted from tongue images using a  
290 deep learning model. This finding indicates that the evaluation of human health based on tongue  
291 characteristics, as proposed by TCM theory, has scientific grounds. Furthermore, we found that the  
292 deep-learning model can extract informative features for PLGC prediction from inquiry information,  
293 suggesting that the evaluation of human health based on demographic, behavioral, and physical  
294 symptom information in inquiries, as guided by TCM theory, is scientifically supported. We believe  
295 that with the widespread application of AI and deep learning methods, tongue images and inquiry  
296 information can potentially become cost-effective, non-invasive and acceptable approaches for  
297 predicting and screening PLGC, which will also lead to significant socio-economic impacts.

298 Nevertheless, our research has some limitations. One limitation of our study is the restricted number  
299 of patients included. For future research, it will be essential to involve a larger screening population  
300 to improve the training of the deep learning model. Additionally, there is potential to expand by  
301 creating a semantic dataset of tongue images and establishing a multimodal large language model for  
302 PLGC prediction, offering personalized predictions and detailed explanations for clinicians and  
303 patients. These areas merit further exploration in the future.

304 In conclusion, this study introduces a hierarchical AI-based multimodal non-invasive method for pre-  
305 endoscopic risk screening. All these findings indicate that AITonguequiry is a non-invasive method  
306 for predicting and assessing PLGC and high-risk PLGC, showcasing its strong performance in graded  
307 screening and diagnosis. Our method has a good potential for widespread clinical use, and further  
308 studies in larger patient populations are needed. We will further promote the application of  
309 AITonguequiry in PLGC risk prediction and provide tailored recommendations for endoscopy to  
310 improve the diagnosis rate, especially high-risk PLGC, in the natural population. Moreover, this  
311 study provides scientific support for the theory of tongue images and inquiry information diagnosis in  
312 TCM.



313 **5 References**

1. Sung H, Ferlay J, Siegel RL, Laversanne M, Soerjomataram I, Jemal A, et al. (2021) Global Cancer Statistics 2020: GLOBOCAN Estimates of Incidence and Mortality Worldwide for 36 Cancers in 185 Countries. *CA Cancer J Clin.* 71(3):209-249. doi: 10.3322/caac.21660.
2. Zong L, Abe M, Seto Y, Ji J. (2016) The challenge of screening for early gastric cancer in China. *Lancet.* 388(10060):2606. doi: 10.1016/S0140-6736(16)32226-7.
3. Rawla P, Barsouk A. (2019) Epidemiology of gastric cancer: global trends, risk factors and prevention. *Prz Gastroenterol.* 14(1):26-38. doi: 10.5114/pg.2018.80001.
4. de Vries AC, van Grieken NC, Looman CW, Casparie MK, de Vries E, Meijer GA, et al. (2008) Gastric cancer risk in patients with premalignant gastric lesions: a nationwide cohort study in the Netherlands. *Gastroenterology.* 134(4):945-52. doi: 10.1053/j.gastro.2008.01.071.
5. Thrift AP, El-Serag HB. (2020) Burden of Gastric Cancer. *Clin Gastroenterol Hepatol.* 18(3):534-542. doi: 10.1016/j.cgh.2019.07.045.
6. Zhang P, Yang M, Zhang Y, Xiao S, Lai X, Tan A, Du S, Li S. (2019) Dissecting the Single-Cell Transcriptome Network Underlying Gastric Premalignant Lesions and Early Gastric Cancer. *Cell Rep.* 27(6): 1934-1947. e5. doi: 10.1016/j.celrep. 2019. 04. 052.
7. Huang S, Guo Y, Li ZW, Shui G, Tian H, Li BW, et al. (2021) Identification and Validation of Plasma Metabolomic Signatures in Precancerous Gastric Lesions That Progress to Cancer. *JAMA Netw Open.* 4(6): e2114186. doi: 10.1001/ jamanetworkopen. 2021.14186.
8. Cubiella J, Pérez Aisa Á, Cuatrecasas M, Díez Redondo P, Fernández Esparrach G, Marín-Gabriel JC, et al. (2021) Gastric cancer screening in low incidence populations: Position statement of AEG, SEED and SEAP. *Gastroenterol Hepatol.* 44(1):67-86. Spanish. doi:10.1016/j.gastrohep.2020.08.004.
9. Gholami E, Tabbakh S, kheirabadi M. (2021) Increasing the accuracy in the diagnosis of stomach cancer based on color and lint features of tongue. *Biomed. Signal Process. Control.* 69, 102782. doi:10.1016/j.bspc.2021.102782
10. Zhu X, Ma Y, Guo D, Men J, Xue C, Cao X, et al. (2022) A Framework to Predict Gastric Cancer Based on Tongue Features and Deep Learning. *Micromachines (Basel).* 14(1):53. doi: 10.3390/mi14010053.
11. Shang Z, Du ZG, Guan B, Ji XY, Chen LC, Wang YJ, Ma Y. (2022) Correlation analysis between characteristics under gastroscop and image information of tongue in patients with chronic gastriti. *J Tradit Chin Med.* 42(1):102-107. doi: 10.19852/ j.cnki. jtc.2022.01.006.
12. Kainuma M, Furusyo N, Urita Y, Nagata M, Ihara T, Oji T, et al. (2015) The association between objective tongue color and endoscopic findings: results from the Kyushu and Okinawa population study (KOPS). *BMC Complement Altern Med.* 15:372. doi: 10.1186/s12906-015-0904-0.

13. Hou C, Cui Y, Xu Y, Wang Y, Hao Y. (2022) TCM Syndrome Recognition Model of Type 2 Diabetes Mellitus in Shanghai Based on TCM Inquiry Information. *Evid Based Complement Alternat Med.* 2022:2843218. doi: 10.1155/2022/2843218.
14. Tan MC, Sen A, Kligman E, Othman MO, Liu Y, El-Serag HB, et al. (2023) Validation of a pre-endoscopy risk score for predicting the presence of gastric intestinal metaplasia in a U.S. population. *Gastrointest Endosc.* 98(4):569-576.e1. doi: 10.1016/j.gie.2023.05.048.
15. Takenaka K, Ohtsuka K, Fujii T, Negi M, Suzuki K, Shimizu H, et al. (2020) Development and Validation of a Deep Neural Network for Accurate Evaluation of Endoscopic Images From Patients With Ulcerative Colitis. *Gastroenterology.* 158(8):2150-2157. doi: 10.1053/j.gastro.2020.02.012.
16. Yu G, Sun K, Xu C, Shi XH, Wu C, Xie T, Meng RQ, Meng XH, Wang KS, Xiao HM, Deng HW. (2021) Accurate recognition of colorectal cancer with semi-supervised deep learning on pathological images. *Nat Commun.* 12(1):6311. doi: 10.1038/s41467-021-26643-8.
17. Cheung CY, Xu D, Cheng CY, et al. (2021) A deep-learning system for the assessment of cardiovascular disease risk via the measurement of retinal-vessel calibre. *Nat Biomed Eng.* 5:498–508. doi: 10.1038/s41551-020-00626-4.
18. Zhang P, Wang B, Li S. (2023) Network-based cancer precision prevention with artificial intelligence and multi-omics. *Sci Bull (Beijing).* 68(12):1219-1222. doi: 10.1016/j.scib.2023.05.023.
19. Pan F, Feng L, Liu B, Hu Y, Wang Q. (2023) Application of radiomics in diagnosis and treatment of lung cancer. *Front Pharmacol.* 14:1295511. doi: 10.3389/fphar.2023.1295511.
20. Wang L, He R, et.al. (2023) Deep learning radiomics for assessment of gastroesophageal varices in people with compensated advanced chronic liver disease. *arXiv preprint arXiv:2306.07505.*
21. Ma C, Zhang P, Du S, Li Y, Li S. (2023) Construction of Tongue Image-Based Machine Learning Model for Screening Patients with Gastric Precancerous Lesions. *J Pers Med.* 13(2):271. doi: 10.3390/jpm13020271.
22. Li Y. and Lin Y. et.al. (2023) Development of a tongue image-based machine learning tool for the diagnosis of gastric cancer: a prospective multicentre clinical cohort study. *eClinicalMedicine.* 57:101834. doi: 10.1016/j.eclinm.2023.101834.
23. Li S, Lu AP, Zhang L, Li YD. (2003) Anti-Helicobacter pylori immunoglobulin G (IgG) and IgA antibody responses and the value of clinical presentations in diagnosis of H. pylori infection in patients with precancerous lesions. *World J Gastroenterol* , 9(4), 755–758. doi:10.3748/wjg.v9.i4.755
24. He K, Zhang X, Ren S, et al. (2016) Deep residual learning for image recognition. *Proc. IEEE Conf. Comput. Vis. Pattern Recog.* 770-778. doi: 10.1109/CVPR.2016.90.
25. He J, Chen WQ, Li ZS, et al. (2022) China guideline for the screening, early detection and early treatment of esophageal cancer (2022, Beijing). *Zhong hua Zhong Liu Za Zhi.* 44(6):491-522. Chinese. doi: 10.3760/cma.j.cn112152-20220517-00348.

26. Zhang Q, Yang M, Zhang P, Wu B, Wei X, Li S. (2023) Deciphering gastric inflammation-induced tumorigenesis through multi-omics data and AI methods. *Cancer Biol Med*. j.issn.2095-3941. 2023. doi: 10.20892/j.issn.2095-3941.2023.0129.
27. Thrift AP, Wenker TN, El-Serag HB. (2023) Global burden of gastric cancer: epidemiological trends, risk factors, screening and prevention. *Nat Rev Clin Oncol*. 20(5):338-349. doi: 10.1038/s41571-023-00747-0.
28. Li J, Zhang Z, Zhu X, Zhao Y, Ma Y, Zang J, Li B, Cao X, Xue C. (2022) Automatic Classification Framework of Tongue Feature Based on Convolutional Neural Networks. *Micromachines (Basel)*. 13(4):501. doi: 10.3390/mi13040501.
29. Tania MH, Lwin K, Hossain MA. (2019) Advances in automated tongue diagnosis techniques. *Integr Med Res*. 8(1):42-56. doi: 10.1016/j.imr.2018.03.001.
30. 李梢 (2002). 王永炎院士从“络”辨治痹病学术思想举隅. *北京中医药大学学报*. 25(1):43-45.
31. Gualtierotti R, Marzano A V, Spadari F, et al. (2018). Main oral manifestations in immune-mediated and inflammatory rheumatic diseases. *Journal of Clinical Medicine*, 8(1): 21. doi: 10.3390/jcm8010021.
32. Yao Y, Habib M, Bajwa HF, et al. (2024). Sympathetic circuits regulating hepatic glucose metabolism: where we stand. *Physiological reviews*, 104(1), 85–101. doi: 10.1152/physrev.00005.2023.
33. Anastasi JK, Chang M, Quinn J, Capili B. (2014) Tongue Inspection in TCM: Observations in a Study Sample of Patients Living with HIV. *Med Acupunct*. 26(1):15-22. doi: 10.1089/acu.2013.1011.

314

## 315 **Author contributions**

316 Study conception and design: Shao Li, Peng Zhang, Lan Wang, Qian Zhang and Kaiqiang Tang;

317 Data collection and analysis: Shao Li, Lan Wang, Qian Zhang, Bowen Wu, Shiyu Du and Kaiqiang  
318 Tang;

319 The first draft of the manuscript: Lan Wang, Kaiqiang Tang, Qian Zhang;

320 Commented on previous versions of the manuscript: Shao Li, Peng Zhang.

321 All authors read and approved the final manuscript.

322

## 323 **Compliance with Ethical Requirements**

324 (1) Conflict of Interest (CoI) statements

325 Lan Wang, Peng Zhang, Qian Zhang, Bowen Wu, Shiyu Du, Kaiqiang Tang and Shao Li declared no  
326 conflicts of interest related to this study.

327 (2) Informed Consent in Studies with Human Subjects

328 All procedures followed were in accordance with the ethical standards of the responsible committee  
329 on human experimentation (institutional and national) and with the Helsinki Declaration of 1975, as  
330 revised in 2008 (5). Informed consent was obtained from all patients for being included in the study.

331 (3) Data availability

332 The data of individual deidentified participants will not be shared, but it is available upon request via  
333 email: [shaoli@mail.tsinghua.edu.cn](mailto:shaoli@mail.tsinghua.edu.cn).

334 **Figure 1.** AITonguequiry flow chart. (a) The study cohort and the diagnostic model. (b) A deep  
 335 learning-based multimodality classification model was developed to assess the risk of PLGC and high-  
 336 risk PLGC based on the tongue images and inquiry information.

a

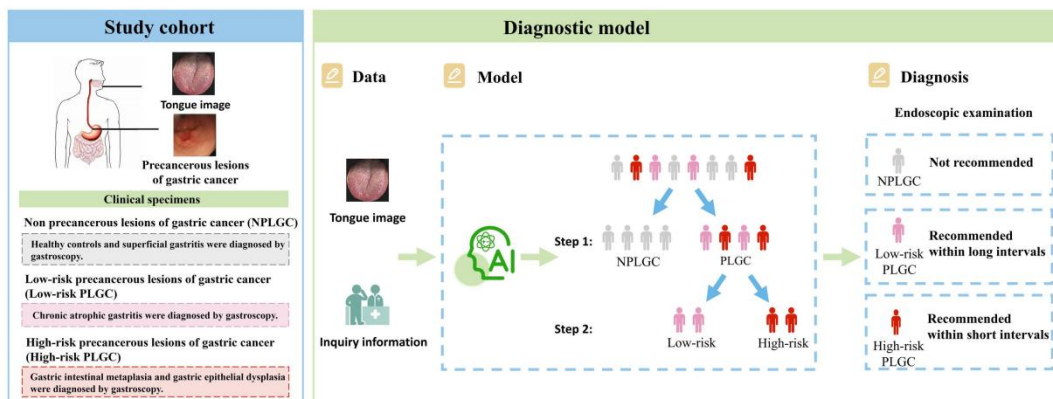

b

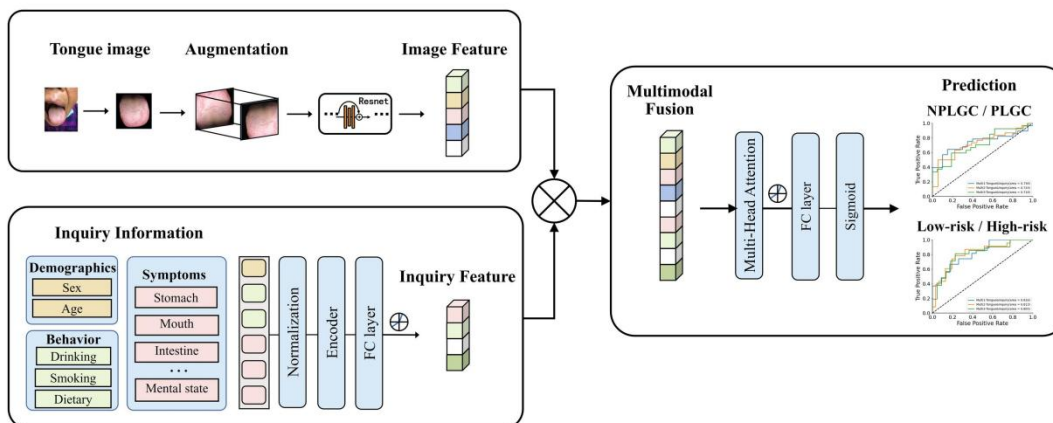

337

338 PLGC, precursor lesions of gastric cancer; NPLGC, Non-precursor lesions of gastric cancer.

339 **Figure 2.** Comparison of ROC curves between different methods for classifying the presence or  
340 absence of PLGC and high-risk PLGC in the validation cohorts. (a) Presence or absence of  
341 NPLGC/PLGC in the validation cohorts. (b) Presence or absence of low-risk PLGC/high-risk PLGC  
342 in validation cohorts.

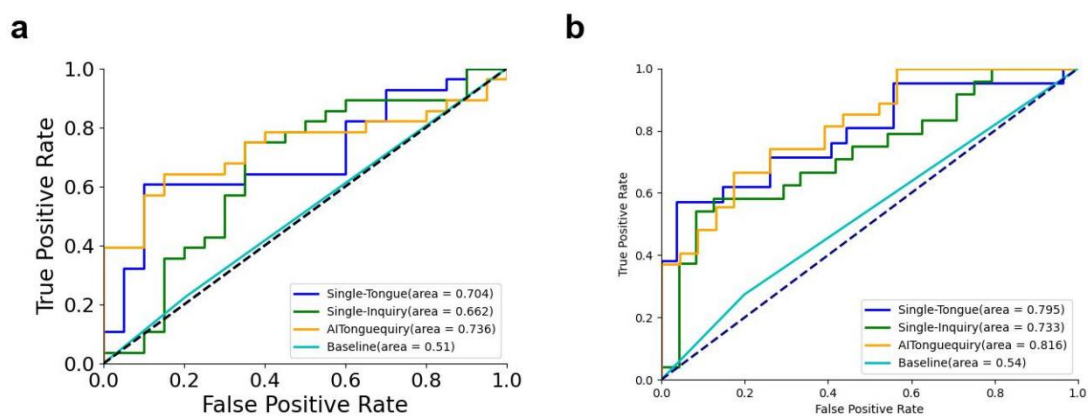

343

344 PLGC, precursor lesions of gastric cancer; NPLGC, Non-precursor lesions of gastric cancer; Single-  
345 Tongue, single-modality deep learning risk prediction with tongue images; Single-Inquiry, single-  
346 modality deep learning risk prediction with inquiry information; AITonguequiry, multimodality deep  
347 learning risk prediction with tongue images and inquiry information.

348 **Figure 3.** Comparison of receiver operating characteristic (ROC) curves among different combinations  
349 using AITonguequiry. (a) Presence or absence of NPLGC/PLGC in the validation cohorts. (b) Presence  
350 or absence of low-risk PLGC/high-risk PLGC in validation cohorts.

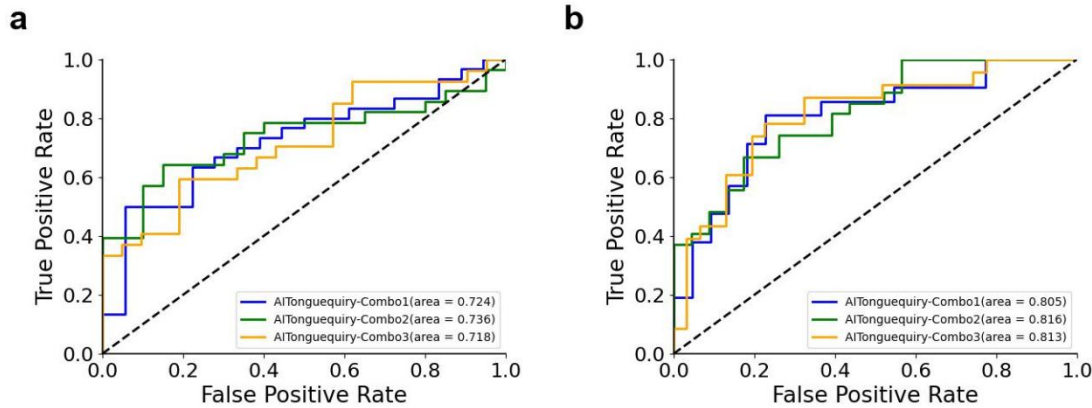

351

352 PLGC, precursor lesions of gastric cancer; NPLGC, Non-precursor lesions of gastric cancer;  
353 AITonguequiry, multimodality deep learning risk prediction with tongue images and inquiry  
354 information.

355 **Figure 4.** Receiver operating characteristic (ROC) curves during the external validation using Single-  
356 Tongue. Presence or absence of NPLGC/PLGC in the external validation cohorts and presence or  
357 absence of low-risk PLGC/high-risk PLGC in the external validation cohorts.

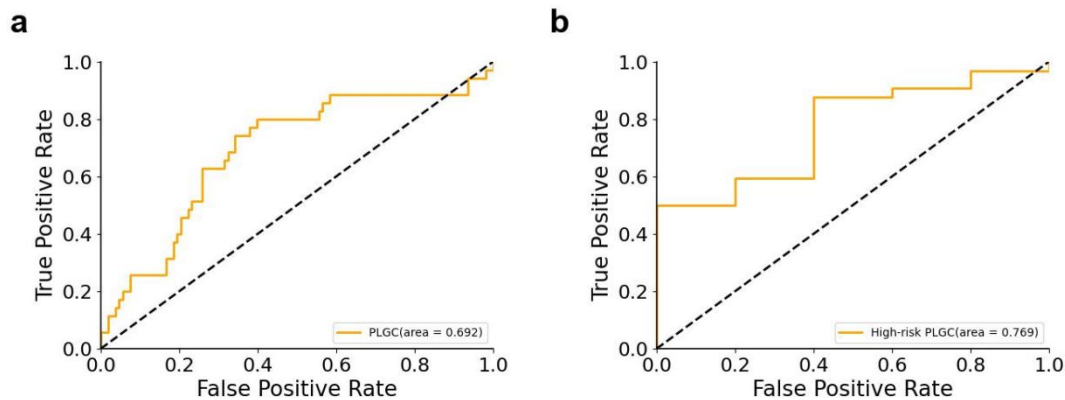

358

359 PLGC, precursor lesions of gastric cancer; NPLGC, Non-precursor lesions of gastric cancer.

360



361 **Table 1.** Baseline characteristics of the study cohort: NPLGC and PLGC.

| Characteristic                 | Training and validation dataset <sup>1</sup> |               | p-value <sup>2</sup> |
|--------------------------------|----------------------------------------------|---------------|----------------------|
|                                | NPLGC, N = 509                               | PLGC, N = 525 |                      |
| Age (Years)                    | 59 (9)                                       | 61 (8)        | <0.001               |
| Sex (Female/Male)              | 343 /166                                     | 345 /180      | 0.57                 |
| Family history (Yes/No)        | 39/470                                       | 47/478        | 0.45                 |
| Drinking (Yes/No)              | 136/373                                      | 144/381       | 0.80                 |
| Smoking (Yes/No)               | 141/368                                      | 153/372       | 0.61                 |
| Hp (Positive/Negative/Unknown) | 14/31/464                                    | 19/32/474     | 0.73                 |

362 <sup>1</sup>Mean (SD); n (%)

363 <sup>2</sup>Welch Two Sample t-test; Pearson's Chi-squared test; Fisher's exact test

364 PLGC, precursor lesions of gastric cancer; NPLGC, Non-precursor lesions of gastric cancer; Hp,  
365 helicobacter pylori.

366 **Table 2.** Baseline characteristics of the study cohort: low-risk PLGC and high-risk PLGC.

| Characteristic                 | Training and validation dataset <sup>1</sup> |                         | p-value <sup>2</sup> |
|--------------------------------|----------------------------------------------|-------------------------|----------------------|
|                                | Low-risk PLGC, N = 346                       | High-risk PLGC, N = 179 |                      |
| Age (Years)                    | 61 (8)                                       | 62 (7)                  | 0.45                 |
| Sex (Female/Male)              | 240/106                                      | 105/74                  | 0.014                |
| Family history (Yes/No)        | 27/319                                       | 20/159                  | 0.20                 |
| Drinking (Yes/No)              | 77/269                                       | 67/112                  | <0.001               |
| Smoking (Yes/No)               | 86/260                                       | 67/112                  | 0.003                |
| Hp (Positive/Negative/Unknown) | 6/19/321                                     | 13/13/153               | 0.004                |

367 <sup>1</sup>Mean (SD); n (%)

368 <sup>2</sup>Welch Two Sample t-test; Pearson's Chi-squared test; Fisher's exact test

369 PLGC, precursor lesions of gastric cancer; NPLGC, Non-precursor lesions of gastric cancer; Hp,  
370 helicobacter pylori.

371 **Table 3.** Diagnostic performance of AITonguequiry for the assessment of NPLGC/PLGC and low-risk  
 372 PLGC/high-risk PLGC in the validation cohorts.

|            |                | AUC            | Specificity (%)  | Sensitivity (%)  | PPV (%)          | NPV (%)          |
|------------|----------------|----------------|------------------|------------------|------------------|------------------|
| Step 1:    | Single-Tongue  | 0.70*          | 54.55            | 86.67            | 46.43            | 90.00            |
| NPLGC      |                | (0.68 to 0.73) | (53.14 to 56.02) | (84.23 to 89.18) | (43.65 to 49.31) | (87.99 to 91.96) |
| /PLGC      | Single-Inquiry | 0.66*          | 62.50            | 68.75            | 78.57            | 50.00            |
|            |                | (0.64 to 0.69) | (59.63 to 65.58) | (67.13 to 70.32) | (76.33 to 80.96) | (46.58 to 53.42) |
|            | AITonguequiry  | 0.74           | 66.67            | 73.33            | 78.57            | 60.00            |
|            |                | (0.71 to 0.76) | (63.94 to 69.43) | (71.59 to 75.04) | (76.16 to 80.87) | (56.66 to 63.27) |
| Step 2:    |                |                |                  |                  |                  |                  |
| Low-risk   | Single-Tongue  | 0.79*          | 90.00            | 52.63            | 95.24            | 33.33            |
| PLGC       |                | (0.78 to 0.82) | (86.97 to 92.58) | (51.54 to 53.69) | (93.60 to 96.57) | (30.58 to 36.00) |
| /High-risk | Single-Inquiry | 0.73*          | 64.00            | 65.22            | 62.50            | 66.67            |
| PLGC       |                | (0.71 to 0.75) | (61.91 to 66.18) | (63.03 to 67.39) | (59.50 to 65.60) | (63.80 to 69.50) |
|            | AITonguequiry  | 0.82           | 66.67            | 78.26            | 66.67            | 78.26            |
|            |                | (0.80 to 0.83) | (64.61 to 68.66) | (76.09 to 80.44) | (63.79 to 69.44) | (75.52 to 80.85) |

373

374 The AUC of AITonguequiry was statistically compared with the AUCs of Single-Tongue and Single-  
 375 Inquiry (\*P<0.05; \*\*P<0.01).

376 AUC, area under the receiver operating characteristic curve; PLGC, precursor lesions of gastric cancer;  
 377 NPLGC, Non-precursor lesions of gastric cancer; Single-Tongue, single-modality deep learning risk  
 378 prediction with tongue images; Single-Inquiry, single-modality deep learning risk prediction with  
 379 inquiry information; AITonguequiry, multimodality deep learning risk prediction with tongue images  
 380 and inquiry information; PPV, positive predictive value; NPV, negative predictive value.

381 **Table 4.** Diagnostic robustness of AITonguequiry for the assessment of NPLGC/PLGC and low-risk  
 382 PLGC/high-risk PLGC in the validation cohorts.

|                                  | AUC                    | Specificity (%)           | Sensitivity (%)           | PPV (%)                   | NPV (%)                   |
|----------------------------------|------------------------|---------------------------|---------------------------|---------------------------|---------------------------|
| Step1:                           |                        |                           |                           |                           |                           |
| NPLGC/PLGC                       |                        |                           |                           |                           |                           |
| Combo 1                          | 0.74<br>(0.71 to 0.76) | 66.67<br>(63.91 to 69.44) | 73.33<br>(71.62 to 75.06) | 78.57<br>(76.16 to 80.88) | 60.00<br>(56.90 to 63.27) |
| Combo 2                          | 0.72<br>(0.70 to 0.75) | 54.55<br>(52.21 to 56.88) | 76.92<br>(75.00 to 78.79) | 66.67<br>(64.00 to 69.20) | 66.67<br>(63.33 to 70.00) |
| Combo 3                          | 0.72<br>(0.69 to 0.74) | 60.00<br>(57.32 to 62.52) | 67.86<br>(65.96 to 69.73) | 70.37<br>(67.73 to 73.07) | 57.14<br>(53.83 to 60.46) |
| Step2:                           |                        |                           |                           |                           |                           |
| Low-risk PLGC<br>/High-risk PLGC |                        |                           |                           |                           |                           |
| Combo 1                          | 0.82<br>(0.80 to 0.83) | 66.67<br>(64.63 to 68.66) | 78.26<br>(75.95 to 80.51) | 66.67<br>(63.80 to 69.35) | 78.26<br>(75.30 to 80.96) |
| Combo 2                          | 0.81<br>(0.79 to 0.82) | 73.91<br>(72.00 to 76.09) | 75.00<br>(72.80 to 77.17) | 71.43<br>(68.65 to 74.39) | 77.27<br>(74.78 to 79.77) |
| Combo 3                          | 0.81<br>(0.79 to 0.83) | 86.36<br>(84.22 to 88.53) | 62.50<br>(60.66 to 64.32) | 86.96<br>(84.61 to 89.31) | 61.29<br>(58.45 to 64.11) |

383 Statistical values are presented with the 95% CIs when applicable.  
 384 AUCs obtained with three different combinations of patients were statistically compared with each  
 385 other in each classification and each cohort (\*P<0.05; \*\*P<0.01).  
 386 AUC, area under the receiver operating characteristic curve; PLGC, precursor lesions of gastric cancer;  
 387 Combo, combination of patients for training and validation cohorts; PPV, positive predictive value;  
 388 NPV, negative predictive value.

389 **Table 5.** Diagnostic performance of Single-Tongue for the assessment of NPLGC/PLGC and low-risk  
390 PLGC/high-risk PLGC in the external validation cohorts.

|                 | AUC                    | Specificity (%)           | Sensitivity (%)           | PPV (%)                   | NPV (%)                   |
|-----------------|------------------------|---------------------------|---------------------------|---------------------------|---------------------------|
| Step 1:         |                        |                           |                           |                           |                           |
| NPLGC/PLGC      | 0.69<br>(0.66 to 0.72) | 80.56<br>(79.36 to 81.73) | 40.00<br>(36.36 to 43.56) | 40.00<br>(35.58 to 44.18) | 80.56<br>(78.61 to 82.52) |
| Step 2:         |                        |                           |                           |                           |                           |
| Low-risk PLGC   | 0.77                   | 33.33                     | 88.24                     | 93.75                     | 20.00                     |
| /High-risk PLGC | (0.74 to 0.79)         | (26.49 to 40.00)          | (87.61 to 88.90)          | (92.60 to 94.85)          | (15.19 to 24.81)          |

391

392 AUC, area under the receiver operating characteristic curve; PLGC, precursor lesions of gastric  
393 cancer; NPLGC, Non-precursor lesions of gastric cancer; Single-Tongue, single-modality deep  
394 learning risk prediction with tongue images; Single-Inquiry, single-modality deep learning risk  
395 prediction with inquiry information; AITonguequiry, multimodality deep learning risk prediction with  
396 tongue images and inquiry information; PPV, positive predictive value; NPV, negative predictive  
397 value.
